# Supplementary material for: Sensillar expression and responses of olfactory receptors reveal different peripheral coding in two Helicoverpa species using the same pheromone components
Source: PubMed Central journal article supplement (PMC4705464; doi:10.1038/srep18742), 2016-01-08
Supplement: srep18742-s1.pdf [file srep18742-s1.pdf]

**Sensillar expression and responses of olfactory receptors reveal different peripheral coding in two *Helicoverpa* species using the same pheromone components**

Hetan Chang<sup>1,2,+</sup>, Mengbo Guo<sup>1,2,+</sup>, Bing Wang<sup>1</sup>, Yang Liu<sup>1,\*</sup>, Shuanglin Dong<sup>2</sup>, Guirong Wang<sup>1,\*</sup>

**Supplementary Table 1. The statistical number of different morphology sensilla on the antenna of *H. assulta* and *H. armigera*.**

|                      | <i>Helicoverpa armigera</i> | <i>Helicoverpa assulta</i> |
|----------------------|-----------------------------|----------------------------|
| sensilla trichodea   | 7810                        | 8300                       |
| sensilla basiconica  | 800                         | 1115                       |
| sensilla coeloconica | 550                         | 620                        |
| sensilla chaetica    | 486                         | 450                        |
| Sensilla auricillica | 320                         | 290                        |
| sensilla styloconica | 81                          | 75                         |
| Total NO.            | ~10137                      | ~10850                     |

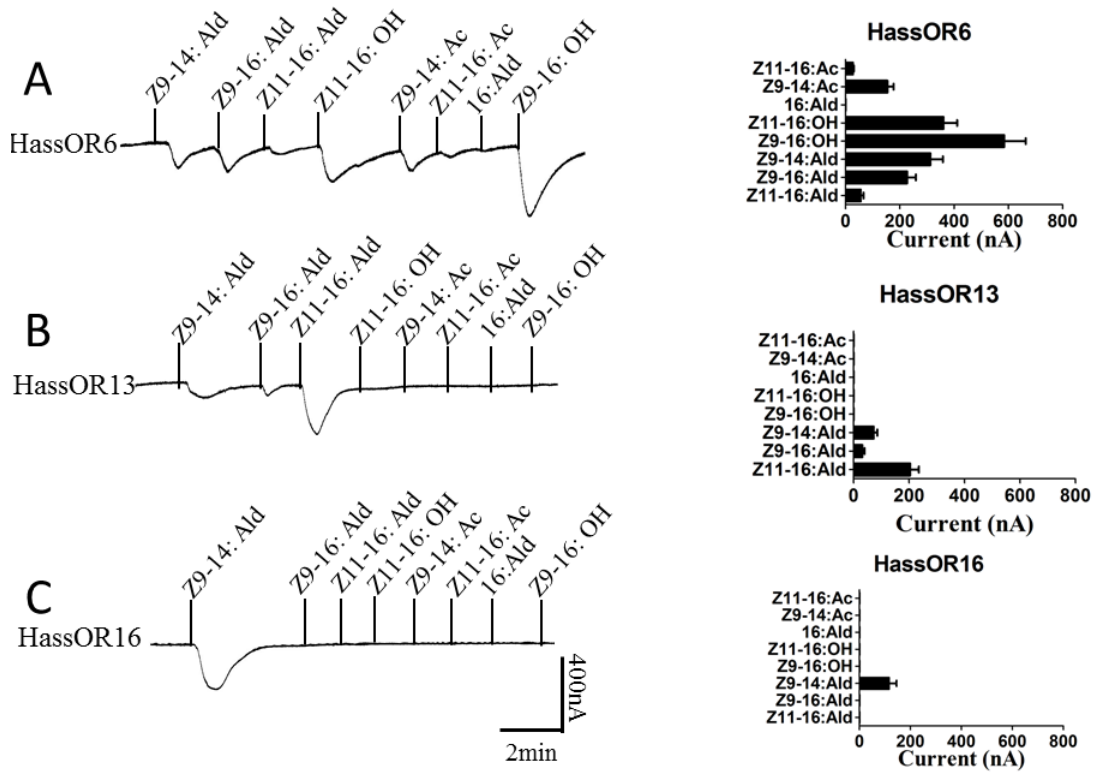

**Supplementary Figure 1. Functional analysis of HassOR6 (A), HassOR13 (B) and HassOR16 (C) in *Xenopus* oocytes.** In each panel: (Left) Inward current responses of HassOR/ HassOrco-coexpressed *Xenopus* oocytes to  $10^{-4}$  mol/L sex pheromone components and analogs. (Right) Response profiles of HassORs. Error bars indicate SEM (n=10).

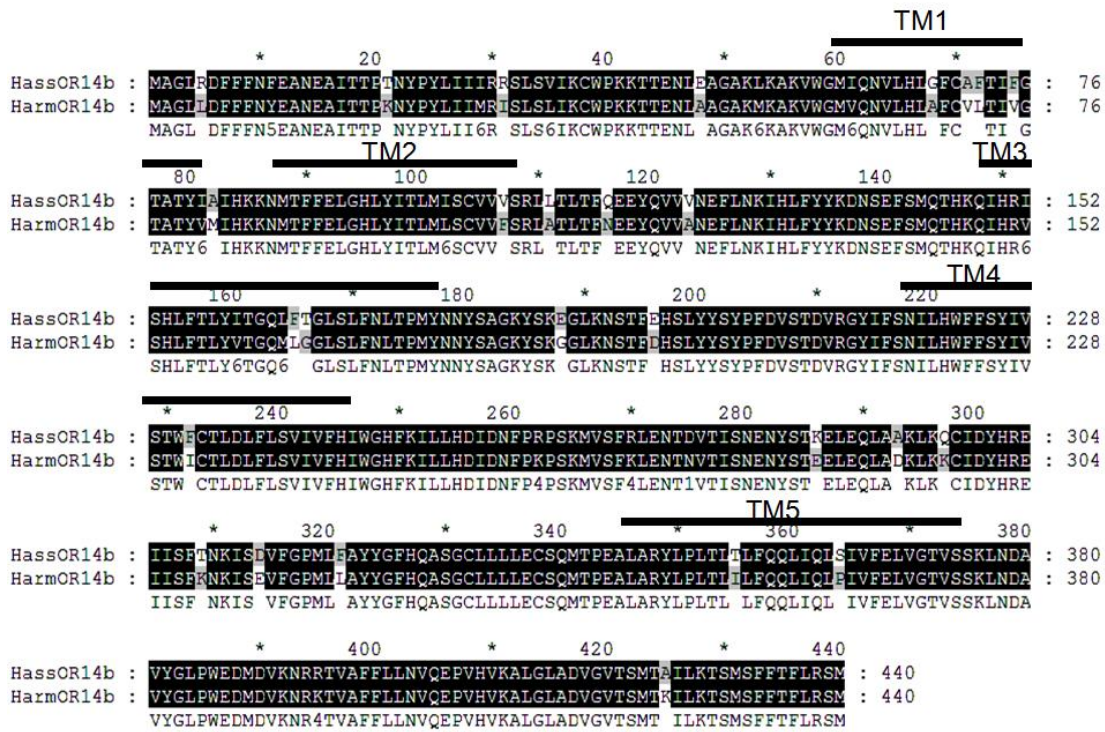

**Supplementary Figure 2. Sequence analysis of the homologous candidate pheromone receptors OR14b of *H. armigera* and *H. assulta***

Five putative trans-membrane domains are indicated with black bar and “TM ‘n’” designation, where ‘n’ designates sequential order of the putative transmembrane domain. Trans-membrane domains were predicted by DNAMAN software.
